# Supplementary material for: Genetic diversity analysis in wheat cultivars using SCoT and ISSR markers, chloroplast DNA barcoding and grain SEM
Source: BMC Plant Biol. 2023 Apr 11;23:193. doi: 10.1186/s12870-023-04196-w (PMC10088244; doi:10.1186/s12870-023-04196-w)
Supplement: Supplementary file 2 — Additional file 2. [file 12870_2023_4196_MOESM2_ESM.xlsx]

## Sheet: ISSR binary scoring
Binary scoring of ISSR molecular markers
						ISSR-1
MW	1	2	3	4	5	6	7	8	9	10	11	12	Frequency		Gel Polymorphism
831.937	0	0	0	1	0	0	1	0	1	0	1	1	0.417		Monomorphic bands	7
686.264	1	1	1	1	1	1	1	1	1	1	1	1	1		Polymorphic (without Unique)	3
555.457	1	0	1	1	0	1	1	1	1	1	1	1	0.833		Unique bands	3
499.724	0	0	0	0	0	1	0	0	0	0	0	0	0.083		Polymorphic (with Unique)	6
495.676	1	0	0	0	0	0	0	0	0	0	0	0	0.083		Total number of bands	13
464.45	0	0	0	0	0	0	0	0	0	0	0	1	0.083		Polymorphism (%)	0.46
382.088	1	1	1	1	1	1	1	1	1	1	1	1	1		Mean of band frequency	0.671
344.683	1	1	1	1	1	1	1	1	1	1	1	1	1
322.969	1	1	1	1	1	1	1	1	1	1	1	1	1
259.291	1	0	1	1	0	0	0	0	0	0	0	1	0.333
249.634	1	1	1	1	1	1	1	1	1	1	1	1	1
227.035	1	1	1	1	1	1	1	1	1	1	1	1	1
175.008	1	1	1	1	1	1	1	1	1	1	1	1	1
						ISSR-2
MW	1	2	3	4	5	6	7	8	9	10	11	12	Frequency		Gel Polymorphism
471.294	1	1	1	1	1	1	1	1	1	1	1	1	1		Monomorphic bands	7
277.998	1	1	1	1	1	1	1	1	1	1	1	1	1		Polymorphic (without Unique)	2
390.097	1	1	1	1	1	1	1	1	1	1	1	1	1		Unique bands	2
425.413	1	1	1	1	1	1	1	1	1	1	1	1	1		Polymorphic (with Unique)	4
686.105	1	1	1	1	1	1	1	1	1	1	1	1	1		Total number of bands	11
998.826	1	0	0	1	0	0	1	1	1	1	1	1	0.667		Polymorphism (%)	0.36
1315.97	1	0	0	1	0	0	0	0	0	0	0	0	0.167		Mean of band frequency	0.671
569.392	0	0	0	0	1	0	0	0	0	0	0	0	0.083
243.789	1	1	1	1	1	1	1	1	1	1	1	1	1
175.568	1	1	1	1	1	1	1	1	1	1	1	1	1
198.112	0	0	0	0	1	0	0	0	0	0	0	0	0.083
						ISSR-6
MW	1	2	3	4	5	6	7	8	9	10	11	12	Frequency		Gel Polymorphism
1153.17	0	0	0	1	0	1	0	0	0	1	1	1	0.417		Monomorphic bands	5
944.454	1	0	0	0	0	0	0	0	0	0	0	0	0.083		Polymorphic (without Unique)	8
846.351	1	1	1	1	1	1	1	1	1	1	1	1	1		Unique bands	1
733.272	1	0	0	1	1	1	1	1	1	1	1	1	0.833		Polymorphic (with Unique)	9
658.955	0	0	0	1	0	1	1	0	0	1	1	1	0.5		Total number of bands	14
602.247	0	0	0	0	0	1	1	1	1	1	1	1	0.583		Polymorphism (%)	0.64
548.873	0	0	0	1	0	0	0	1	0	0	0	1	0.25		Mean of band frequency	0.671
511.611	1	0	0	1	0	0	0	0	1	1	0	0	0.333
478.221	0	0	0	1	1	1	0	0	0	1	1	1	0.5
433.394	1	1	1	1	1	1	1	1	1	1	1	1	1
358.969	1	1	1	1	1	1	1	1	1	1	1	1	1
312.762	1	1	1	1	1	1	1	1	1	1	1	1	1
251.869	1	1	1	1	1	1	1	1	1	1	1	1	1
205.703	0	0	0	1	1	1	1	1	1	1	1	1	0.75
						ISSR-7
MW	1	2	3	4	5	6	7	8	9	10	11	12	Frequency		Gel Polymorphism
764.666	1	0	0	0	0	0	1	1	0	1	1	0	0.417		Monomorphic bands	5
705.105	1	1	1	1	1	1	1	1	1	1	1	1	1		Polymorphic (without Unique)	6
652.296	0	0	0	0	0	0	1	0	0	0	1	0	0.167		Unique bands	1
580.404	0	0	0	0	0	0	0	1	0	0	0	0	0.083		Polymorphic (with Unique)	7
531.735	1	0	0	1	1	1	1	1	1	1	1	1	0.833		Total number of bands	12
485.569	1	0	0	0	0	1	0	0	1	0	1	0	0.333		Polymorphism (%)	0.58
443.412	1	1	0	1	1	1	1	1	1	1	1	1	0.917		Mean of band frequency	0.671
346.533	1	1	1	1	1	1	1	1	1	1	1	1	1
311.356	1	1	1	1	1	1	1	1	1	1	1	1	1
301.418	1	1	1	1	1	1	1	1	1	1	1	1	1
262.177	1	1	1	1	1	1	1	1	1	1	1	1	1
201.599	0	0	0	1	1	1	1	1	1	1	1	1	0.75
						ISSR-8
MW	1	2	3	4	5	6	7	8	9	10	11	12	Frequency		Gel Polymorphism
767.535	1	1	1	0	1	1	1	1	1	1	1	1	0.917		Monomorphic bands	6
599.817	1	1	0	0	0	0	0	1	1	0	0	0	0.333		Polymorphic (without Unique)	3
539.238	1	1	1	1	1	1	1	1	1	1	1	1	1		Unique bands	0
471.382	1	1	1	1	1	1	1	1	1	1	1	1	1		Polymorphic (with Unique)	3
409.763	1	1	1	1	1	1	1	1	1	1	1	1	1		Total number of bands	9
337.733	1	1	1	1	1	1	1	1	1	1	1	1	1		Polymorphism (%)	0.33
301.081	1	1	1	1	0	0	0	0	0	1	1	1	0.583		Mean of band frequency	0.9
241.299	1	1	1	1	1	1	1	1	1	1	1	1	1
221.846	1	1	1	1	1	1	1	1	1	1	1	1	1
						ISSR-9
MW	1	2	3	4	5	6	7	8	9	10	11	12	Frequency		Gel Polymorphism
1807.57	0	0	0	0	0	0	0	0	0	0	1	0	0.083		Monomorphic bands	3
1142.47	1	0	0	1	0	1	1	1	0	1	1	1	0.667		Polymorphic (without Unique)	11
979.39	0	0	1	1	0	1	1	1	1	0	0	0	0.5		Unique bands	1
881.887	1	0	1	1	1	1	1	1	1	1	1	1	0.917		Polymorphic (with Unique)	12
783.75	1	1	1	0	0	0	0	1	1	1	1	1	0.667		Total number of bands	15
724.471	1	1	1	1	1	1	1	0	0	1	1	1	0.833		Polymorphism (%)	0.8
685.214	0	0	0	0	0	0	0	0	0	1	1	1	0.25		Mean of band frequency	0.7
621.055	1	0	1	1	1	1	1	1	1	0	0	0	0.667
570.331	1	0	1	1	1	0	1	0	1	1	1	1	0.75
498.627	1	1	1	1	1	1	1	1	1	1	1	1	1
440.244	1	1	1	1	0	1	1	1	1	1	1	1	0.917
374.936	1	0	1	1	1	1	1	1	1	1	1	1	0.917
316.191	1	1	1	1	1	1	1	1	1	1	1	1	1
286.585	1	1	1	1	1	1	1	1	1	1	1	1	1
239.319	0	0	0	0	1	1	1	0	1	1	1	1	0.583
						ISSR-12
MW	1	2	3	4	5	6	7	8	9	10	11	12	Frequency		Gel Polymorphism
695.14	1	1	1	1	1	1	1	1	1	1	1	1	1		Monomorphic bands	7
651.342	1	1	1	1	1	1	1	1	1	1	1	1	1		Polymorphic (without Unique)	1
509.375	1	1	1	1	1	1	1	1	1	1	1	1	1		Unique bands	0
357.406	1	1	1	1	1	1	1	1	1	1	1	1	1		Polymorphic (with Unique)	1
319.511	0	0	0	0	0	0	1	1	1	1	1	1	0.5		Total number of bands	8
439.199	1	1	1	1	1	1	1	1	1	1	1	1	1		Polymorphism (%)	0.13
276.49	1	1	1	1	1	1	1	1	1	1	1	1	1		Mean of band frequency	0.9
222.571	1	1	1	1	1	1	1	1	1	1	1	1	1
						ISSR-13
MW	1	2	3	4	5	6	7	8	9	10	11	12	Frequency		Gel Polymorphism
1960.06	1	1	1	1	1	1	1	1	1	1	1	1	1		Monomorphic bands	8
1594.58	1	1	1	1	1	1	1	0	0	0	0	0	0.583		Polymorphic (without Unique)	14
1491.89	0	0	0	0	0	0	0	0	0	1	1	1	0.25		Unique bands	1
1301.58	1	1	1	1	1	1	1	1	1	1	1	1	1		Polymorphic (with Unique)	15
1166.18	1	1	1	1	1	1	1	1	1	1	1	1	1		Total number of bands	23
993.99	1	1	1	0	0	0	1	1	1	1	1	1	0.75		Polymorphism (%)	0.65
896.542	1	1	1	1	1	1	0	0	0	0	0	0	0.5		Mean of band frequency	0.6
858.576	0	0	0	0	0	0	1	1	1	1	1	0	0.417
766.71	0	0	0	1	1	1	0	0	0	0	0	1	0.333
719.724	1	1	1	0	0	0	1	1	1	1	1	1	0.75
714.949	0	0	0	1	1	1	0	0	0	0	0	0	0.25
673.372	1	1	1	1	1	1	1	1	1	1	1	1	1
597.333	0	0	0	1	1	1	0	0	0	0	0	0	0.25
551.472	1	1	1	1	1	1	1	1	1	1	1	1	1
500.73	0	0	0	1	1	1	0	0	0	0	1	1	0.417
451.64	0	0	0	0	0	0	1	1	1	1	0	0	0.333
394.027	1	1	1	1	1	1	1	1	1	1	1	1	1
335.846	0	0	0	0	0	0	0	1	1	1	1	0	0.333
304.944	1	1	1	1	1	1	1	1	1	1	1	1	1
278.735	0	1	0	1	1	1	0	0	0	0	0	1	0.417
237.578	1	1	1	1	1	1	1	1	1	1	1	1	1
182.645	1	0	0	0	0	0	1	0	0	0	0	0	0.167
165.84	0	1	0	0	0	0	0	0	0	0	0	0	0.083
						ISSR-14
MW	1	2	3	4	5	6	7	8	9	10	11	12	Frequency		Gel Polymorphism
1545.06	1	1	1	1	1	1	1	1	1	1	1	1	1		Monomorphic bands	7
1213.52	0	0	0	0	0	1	0	0	1	1	1	1	0.417		Polymorphic (without Unique)	3
1110.8	0	0	0	0	0	1	0	0	0	1	1	1	0.333		Unique bands	1
962.906	1	1	1	1	1	1	1	1	1	1	1	1	1		Polymorphic (with Unique)	4
806.786	1	1	1	1	1	1	1	1	1	1	1	1	1		Total number of bands	11
680.593	0	1	1	1	1	1	1	1	1	0	1	1	0.833		Polymorphism (%)	0.36
644.538	0	0	0	0	0	0	0	0	0	1	0	0	0.083		Mean of band frequency	0.8
572.188	1	1	1	1	1	1	1	1	1	1	1	1	1
401.686	1	1	1	1	1	1	1	1	1	1	1	1	1
349.392	1	1	1	1	1	1	1	1	1	1	1	1	1
295.746	1	1	1	1	1	1	1	1	1	1	1	1	1
						ISSR-15
MW	1	2	3	4	5	6	7	8	9	10	11	12	Frequency		Gel Polymorphism
1149.48	0	0	0	0	0	0	1	1	1	0	0	0	0.25		Monomorphic bands	5
1072.19	1	1	1	1	1	1	1	1	1	1	1	1	1		Polymorphic (without Unique)	6
978.354	1	1	1	1	1	1	0	0	1	1	1	1	0.833		Unique bands	0
735.184	1	1	1	1	1	1	1	1	1	1	1	1	1		Polymorphic (with Unique)	6
634.972	1	1	1	0	1	0	0	0	1	1	1	0	0.583		Total number of bands	11
540.443	1	1	1	1	1	1	1	1	1	1	1	1	1		Polymorphism (%)	0.54
470.209	1	1	0	1	1	1	0	0	1	1	1	1	0.75		Mean of band frequency	0.8
418.194	1	1	1	1	1	1	1	1	1	1	1	1	1
333.222	1	0	1	0	1	1	1	1	1	1	1	1	0.833
196.619	1	1	1	0	1	1	0	0	1	1	1	0	0.667
272.413	1	1	1	1	1	1	1	1	1	1	1	1	1
						ISSR-19
MW	1	2	3	4	5	6	7	8	9	10	11	12	Frequency		Gel Polymorphism
1025.51	0	0	0	0	0	0	1	1	1	1	1	1	0.5		Monomorphic bands	7
965.131	1	1	1	1	1	1	0	0	0	0	0	0	0.5		Polymorphic (without Unique)	5
730.589	1	1	1	1	1	1	1	1	1	1	1	1	1		Unique bands	1
644.789	1	1	1	1	1	1	0	0	0	0	0	0	0.5		Polymorphic (with Unique)	6
635.648	0	0	0	0	0	0	1	1	1	1	1	1	0.5		Total number of bands	13
577.248	1	1	1	1	1	1	1	1	1	1	1	1	1		Polymorphism (%)	0.46
511.278	1	1	1	1	1	1	1	1	1	1	1	1	1		Mean of band frequency	0.8
393.999	1	1	1	1	1	1	1	1	1	1	1	1	1
376.134	1	1	1	1	1	1	1	1	1	1	1	1	1
323.769	1	1	1	1	1	1	1	1	1	1	1	1	1
289.855	1	1	1	1	0	0	1	0	1	1	1	1	0.75
232.311	1	1	1	1	1	1	1	1	1	1	1	1	1
166.688	0	0	0	0	0	0	0	0	0	1	0	0	0.083
						ISSR-20
MW	1	2	3	4	5	6	7	8	9	10	11	12	Frequency		Gel Polymorphism
391.348	1	1	1	1	1	1	1	1	1	1	1	1	1		Monomorphic bands	7
422.192	1	1	1	1	1	1	1	1	1	1	1	1	1		Polymorphic (without Unique)	3
492.859	1	1	1	1	1	1	1	1	1	1	1	1	1		Unique bands	0
649.606	1	1	1	1	1	1	1	1	1	1	1	1	1		Polymorphic (with Unique)	3
749.188	1	0	1	1	1	1	0	0	0	1	1	1	0.667		Total number of bands	10
885.267	1	0	1	1	1	1	0	0	1	1	1	1	0.75		Polymorphism (%)	0.3
339.33	1	1	1	1	1	1	1	1	1	1	1	1	1		Mean of band frequency	0.9
317.416	1	1	1	1	1	1	1	1	1	1	1	1	1
271.905	1	1	1	1	1	1	1	1	1	1	1	1	1
235.763	0	0	1	0	0	0	0	0	0	0	0	1	0.167
	1	2	3	4	5	6	7	8	9	10	11	12
1	100
2	89	100
3	92	92	100
4	88	84	87	100
5	86	87	88	90	100
6	85	84	86	92	93	100
7	85	81	85	85	83	85	100
8	84	82	83	82	81	83	93	100
9	87	84	86	83	84	85	92	93	100
10	87	81	84	84	83	85	89	88	91	100
11	86	81	84	85	84	87	90	87	91	96	100
12	84	81	85	89	84	88	88	86	88	92	94	100

## Sheet: SCoT binary scoring
Binary scoring of SCoT molecular markers
						SCoT-2
MW	1	2	3	4	5	6	7	8	9	10	11	12	Frequency		Gel Polymorphism
1027.09	0	0	0	0	0	0	0	0	0	0	1	0	0.083		Monomorphic bands	9
942.29	1	1	1	1	1	1	1	1	1	1	1	1	1		Polymorphic (without Unique)	7
814.767	0	0	1	1	1	0	0	0	1	0	0	0	0.333		Unique bands	2
741.484	1	1	0	0	0	0	0	0	0	0	0	0	0.167		Polymorphic (with Unique)	9
710.216	0	0	0	1	0	1	0	1	1	0	1	1	0.5		Total number of bands	18
649.827	1	1	1	1	1	1	1	1	1	1	1	1	1		Polymorphism (%)	0.5
575.667	0	1	0	0	1	1	0	1	0	0	1	1	0.5		Mean of band frequency	0.671
544.017	1	0	0	0	0	0	0	1	0	0	1	1	0.333
519.674	0	0	1	1	0	0	1	0	1	1	0	1	0.5
503.15	1	1	0	1	1	1	0	1	0	0	1	0	0.583
481.932	0	0	0	0	0	0	0	0	0	0	0	1	0.083
432.72	1	1	1	1	1	1	1	1	1	1	1	1	1
385.407	1	1	1	1	1	1	1	1	1	1	1	1	1
345.121	1	1	1	1	1	1	1	1	1	1	1	1	1
311.553	1	1	1	1	1	1	1	1	1	1	1	1	1
277.488	1	1	1	1	1	1	1	1	1	1	1	1	1
241.881	1	1	1	1	1	1	1	1	1	1	1	1	1
216.597	1	1	1	1	1	1	1	1	1	1	1	1	1
						SCoT-3
MW	1	2	3	4	5	6	7	8	9	10	11	12	Frequency		Gel Polymorphism
860.329	0	0	0	0	1	1	0	0	0	0	0	0	0.167		Monomorphic bands	7
700.079	0	0	0	1	0	0	0	0	0	0	0	1	0.167		Polymorphic (without Unique)	9
616.94	0	0	1	0	0	1	1	0	0	0	0	0	0.25		Unique bands	0
565.001	1	1	1	1	1	1	1	1	0	0	1	1	0.833		Polymorphic (with Unique)	9
524.593	1	1	1	1	1	1	1	1	1	1	1	1	1		Total number of bands	16
469.981	1	1	1	1	1	1	1	1	1	1	1	1	1		Polymorphism (%)	0.5625
444.845	1	1	1	1	1	1	1	1	1	1	1	1	1		Mean of band frequency	0.698
401.834	1	1	1	1	1	1	1	1	1	1	1	1	1
334.255	1	1	1	1	1	1	1	1	1	1	1	1	1
325.194	1	1	1	1	1	1	1	1	1	1	1	1	1
280.343	1	1	1	1	1	1	0	0	0	0	0	1	0.583
247.051	1	1	1	1	1	1	1	1	1	1	1	1	1
227.499	1	1	1	1	1	1	1	1	0	0	0	0	0.667
212.977	0	0	1	1	0	0	1	0	0	0	1	1	0.417
189.76	0	1	1	0	0	0	1	0	0	0	1	1	0.417
171.412	1	1	1	1	1	1	1	0	0	0	0	1	0.667
						SCoT-4
MW	1	2	3	4	5	6	7	8	9	10	11	12	Frequency		Gel Polymorphism
1110.98	1	1	1	1	1	1	1	1	1	1	1	1	1		Monomorphic bands	8
992.842	1	1	1	1	1	1	1	1	1	1	1	1	1		Polymorphic (without Unique)	4
894.097	1	1	1	1	1	1	1	1	1	1	1	1	1		Unique bands	0
778.867	1	0	0	1	1	1	1	1	1	0	1	0	0.667		Polymorphic (with Unique)	4
664.76	1	1	1	1	1	1	1	1	1	1	1	1	1		Total number of bands	12
598.645	1	1	1	1	1	1	1	1	1	1	1	1	1		Polymorphism (%)	0.33333
555.891	1	1	1	1	1	1	1	1	1	1	0	1	0.917		Mean of band frequency	0.875
490.475	1	1	1	1	1	1	1	1	1	1	1	1	1
433.864	1	0	0	0	0	0	1	1	0	0	0	1	0.333
398.781	1	0	1	0	1	0	0	1	1	1	0	1	0.583
312.837	1	1	1	1	1	1	1	1	1	1	1	1	1
262.272	1	1	1	1	1	1	1	1	1	1	1	1	1
						SCoT-5
MW	1	2	3	4	5	6	7	8	9	10	11	12	Frequency		Gel Polymorphism
1895.24	0	0	0	0	1	1	0	0	0	1	0	0	0.25		Monomorphic bands	5
1535.4	1	0	0	0	1	1	0	0	0	1	0	0	0.333		Polymorphic (without Unique)	18
1362.89	0	0	1	0	0	1	0	0	0	1	0	0	0.25		Unique bands	4
1357.49	0	1	0	0	0	0	0	0	0	0	0	0	0.083		Polymorphic (with Unique)	22
1234.04	1	0	0	1	1	0	1	1	0	0	1	1	0.583		Total number of bands	27
1121.81	1	1	1	1	1	1	1	1	1	1	1	1	1		Polymorphism (%)	0.81481
1112.93	1	0	1	0	0	0	0	0	0	1	1	0	0.333		Mean of band frequency	0.488
1078.12	1	0	1	1	0	1	0	0	0	0	0	0	0.333
964.621	0	0	0	0	1	0	0	0	0	0	0	0	0.083
905.214	1	1	1	1	1	0	0	0	0	0	0	0	0.417
822.893	1	1	1	1	1	1	1	1	1	1	1	1	1
793.99	1	0	0	0	1	1	0	1	1	1	1	1	0.667
748.058	1	1	1	0	0	0	1	0	1	1	0	1	0.583
625.597	1	1	1	1	1	1	1	0	0	0	0	0	0.583
580.114	1	0	0	0	0	0	0	0	1	1	0	0	0.25
540.079	1	0	1	1	1	1	1	1	1	1	1	1	0.917
516.986	0	1	1	0	1	1	0	0	0	0	0	0	0.333
457.081	0	0	1	0	0	0	0	1	1	1	0	0	0.333
441.027	0	1	0	0	0	0	0	0	0	0	0	0	0.083
394.598	1	1	1	1	1	1	1	1	1	1	1	1	1
350.264	1	1	1	1	1	1	1	1	1	1	1	1	1
336.621	1	0	1	0	0	1	0	0	0	0	0	0	0.25
310.91	0	1	1	0	0	1	1	1	0	1	1	1	0.667
282.636	0	0	0	0	0	1	1	0	1	0	1	1	0.417
253.888	1	1	1	1	1	1	1	1	1	1	1	1	1
215.727	0	1	0	0	0	0	0	0	0	0	0	0	0.083
193.785	0	0	0	0	1	1	0	1	0	0	0	1	0.333
MW	1	2	3	4	5	6	7	8	9	10	11	12	Frequency		Gel Polymorphism
562.655	1	0	1	1	0	0	1	1	1	1	1	1	0.75		Monomorphic bands	5
285.577	1	1	1	1	1	1	1	1	1	1	1	1	1		Polymorphic (without Unique)	5
369.672	1	0	0	0	0	0	1	0	0	1	1	1	0.417		Unique bands	1
410.084	1	1	0	0	1	1	0	1	1	0	1	1	0.667		Polymorphic (with Unique)	6
454.915	1	1	1	1	1	1	1	1	1	1	1	1	1		Total number of bands	11
513.665	1	1	1	1	1	1	1	1	1	1	1	1	1		Polymorphism (%)	0.54545
614.76	0	0	0	0	0	0	0	0	0	0	1	1	0.167		Mean of band frequency	0.727
659.897	1	1	1	1	1	1	0	1	1	1	1	1	0.917
779.842	1	0	0	0	0	0	0	0	0	0	0	0	0.083
265.371	1	1	1	1	1	1	1	1	1	1	1	1	1
230.893	1	1	1	1	1	1	1	1	1	1	1	1	1
						SCoT-12
MW	1	2	3	4	5	6	7	8	9	10	11	12	Frequency		Gel Polymorphism
632.692	1	0	0	0	0	0	0	0	0	0	0	0	0.083		Monomorphic bands	6
527.644	1	1	1	1	1	0	1	1	1	1	1	1	0.917		Polymorphic (without Unique)	2
452.396	1	0	0	0	0	0	0	0	0	1	0	0	0.167		Unique bands	2
435.994	1	1	1	1	1	1	1	1	1	1	1	1	1		Polymorphic (with Unique)	4
365.85	1	1	1	1	1	1	1	1	1	1	1	1	1		Total number of bands	10
323.478	1	0	0	0	0	0	0	0	0	0	0	0	0.083		Polymorphism (%)	0.4
277.346	1	1	1	1	1	1	1	1	1	1	1	1	1		Mean of band frequency	0.725
245.224	1	1	1	1	1	1	1	1	1	1	1	1	1
216.823	1	1	1	1	1	1	1	1	1	1	1	1	1
212.202	1	1	1	1	1	1	1	1	1	1	1	1	1
						SCoT-13
MW	1	2	3	4	5	6	7	8	9	10	11	12	Frequency		Gel Polymorphism
542.082	1	1	0	1	1	1	0	1	0	0	1	1	0.667		Monomorphic bands	6
186.185	1	1	1	1	1	1	1	1	1	1	1	1	1		Polymorphic (without Unique)	9
213.325	1	1	0	1	1	1	0	0	0	0	1	1	0.583		Unique bands	0
233.323	1	1	1	1	1	1	1	1	1	1	1	1	1		Polymorphic (with Unique)	9
266.448	1	1	1	1	1	1	1	1	1	1	1	1	1		Total number of bands	15
305.287	0	1	1	1	0	0	1	0	1	1	1	1	0.667		Polymorphism (%)	0.6
329.504	1	1	1	1	1	1	1	1	1	0	1	1	0.917		Mean of band frequency	0.795
410.195	1	1	1	1	1	1	1	1	1	1	1	1	1
674.831	1	1	0	0	1	1	0	1	1	0	1	1	0.667
845.684	1	1	0	1	1	1	0	1	1	0	1	0	0.667
175.388	1	1	1	1	1	1	1	1	1	1	1	1	1
161.96	0	0	0	0	1	1	0	1	1	0	1	1	0.5
148.57	1	1	1	0	0	0	1	0	1	0	0	0	0.417
129.239	1	1	1	1	1	1	1	0	0	1	1	1	0.833
113.926	1	1	1	1	1	1	1	1	1	1	1	1	1
117.131	1	1	1	1	1	1	1	1	1	1	1	1	1
						SCoT-16
MW	1	2	3	4	5	6	7	8	9	10	11	12	Frequency		Gel Polymorphism
644.283	1	1	1	1	1	1	1	1	1	1	1	1	1		Monomorphic bands	6
488.915	0	0	0	1	0	0	0	0	1	1	1	1	0.417		Polymorphic (without Unique)	8
515.865	1	1	1	1	1	1	1	1	1	1	1	1	1		Unique bands	0
569.919	1	1	1	1	1	1	1	1	1	1	1	1	1		Polymorphic (with Unique)	8
700.963	0	0	0	1	0	1	1	0	1	1	1	1	0.583		Total number of bands	14
839.318	1	1	1	1	1	1	1	1	1	1	1	1	1		Polymorphism (%)	0.57143
1480.03	1	1	1	1	1	1	1	1	1	1	1	1	1		Mean of band frequency	0.72
445.949	1	1	1	0	1	1	1	0	0	0	0	0	0.5
391.465	1	1	1	0	1	1	1	1	1	0	0	1	0.75
313.439	1	1	1	1	1	1	1	1	1	1	1	1	1
373.869	1	1	1	0	0	0	0	1	0	0	0	0	0.333
282.625	1	1	1	0	1	1	1	1	0	0	1	0	0.667
232.446	1	0	0	0	1	1	1	1	0	0	0	0	0.417
192.647	1	0	1	0	1	1	0	1	0	0	0	0	0.417
						SCoT-20
MW	1	2	3	4	5	6	7	8	9	10	11	12	Frequency		Gel Polymorphism
658.639	1	1	1	1	1	1	1	1	1	1	1	1	1		Monomorphic bands	4
830.923	1	0	0	0	0	0	0	0	0	0	0	0	0.083		Polymorphic (without Unique)	5
678.818	1	1	1	1	1	1	1	1	1	1	1	1	1		Unique bands	2
405.179	0	0	0	1	1	1	1	1	0	1	0	1	0.583		Polymorphic (with Unique)	7
296.933	1	1	1	1	1	1	1	1	1	1	1	1	1		Total number of bands	11
448.958	0	0	0	0	1	0	0	0	1	1	1	0	0.333		Polymorphism (%)	0.63636
363.468	1	1	1	1	1	1	1	1	1	1	1	1	1		Mean of band frequency	0.538
485.602	0	0	0	0	1	0	0	0	0	1	1	0	0.25
539.698	1	0	0	0	0	0	0	0	0	0	1	1	0.25
500.48	1	1	0	0	0	0	0	0	0	0	1	1	0.333
580.235	1	0	0	0	0	0	0	0	0	0	0	0	0.083
						SCoT-22
MW	1	2	3	4	5	6	7	8	9	10	11	12	Frequency		Gel Polymorphism
586.155	0	0	1	1	0	0	1	0	0	1	1	1	0.5		Monomorphic bands	7
484.082	1	1	1	1	1	1	1	1	1	1	1	1	1		Polymorphic (without Unique)	5
428.461	0	0	1	1	0	0	1	0	1	1	1	1	0.583		Unique bands	0
401.106	1	1	0	0	1	1	0	1	0	0	1	1	0.583		Polymorphic (with Unique)	5
368.138	1	1	1	1	1	1	1	1	1	1	1	1	1		Total number of bands	12
335.658	1	1	1	1	1	1	1	1	1	1	1	1	1		Polymorphism (%)	0.41667
309.087	1	1	1	1	0	1	1	1	0	1	0	0	0.667		Mean of band frequency	0.826
261.226	1	1	1	1	1	1	1	1	1	1	1	1	1
238.178	1	1	1	1	1	1	1	1	1	1	1	1	1
215.026	1	1	1	1	1	1	1	1	1	1	1	1	1
187.824	1	1	1	1	1	1	1	1	1	1	1	1	1
152.579	0	1	1	1	1	1	1	0	0	1	0	0	0.583
						SCoT-28
MW	1	2	3	4	5	6	7	8	9	10	11	12	Frequency		Gel Polymorphism
517.899	1	1	1	1	1	1	1	1	1	1	1	1	1		Monomorphic bands	8
494.83	1	1	1	1	1	1	1	1	1	1	1	1	1		Polymorphic (without Unique)	0
412.382	1	1	1	1	1	1	1	1	1	1	1	1	1		Unique bands	1
397.621	1	1	1	1	1	1	1	1	1	1	1	1	1		Polymorphic (with Unique)	1
362.987	1	1	1	1	1	1	1	1	1	1	1	1	1		Total number of bands	9
355.35	1	1	1	1	1	1	1	1	1	1	1	1	1		Polymorphism (%)	0.11111
351.058	0	0	0	0	0	0	0	0	0	0	0	1	0.083		Mean of band frequency	0.898
298.853	1	1	1	1	1	1	1	1	1	1	1	1	1
269.528	1	1	1	1	1	1	1	1	1	1	1	1	1
	1	2	3	4	5	6	7	8	9	10	11	12
1	100
2	89	100
3	88	92	100
4	89	88	88	100
5	87	88	87	92	100
6	85	87	85	92	91	100
7	82	83	85	83	82	83	100
8	80	83	85	84	84	84	87	100
9	81	81	85	85	83	81	86	86	100
10	80	82	83	82	82	80	88	84	89	100
11	81	83	81	84	82	82	84	86	85	86	100
12	84	84	83	86	82	82	86	87	85	87	91	100

## Sheet: Combined binary scoring
Combined binary scoring of ISSR and SCoT molecular markers
0	0	0	0	0	0	0	0	0	0	1	0
1	1	1	1	1	1	1	1	1	1	1	1		0	1	0	1	0	1	0	1	0	1	0	1	1	1	1	1	1	1	0	0	0	1	1	1	1	1	1	1	1	1	1	0	0	1	1	1	1
0	0	1	0	1	0	0	1	1	0	0	0		0	1	0	1	0	1	1	0	0	1	0	1	1	1	1	1	1	1	0	0	0	1	1	1	1	1	1	1	1	1	1	0	1	1	1	1	1
1	1	0	0	0	0	0	0	0	0	0	0		0	1	1	0	0	1	0	0	0	1	0	1	1	1	1	1	1	1	0	0	0	1	1	1	1	1	1	1	1	1	1	1	1	1	1	1	1
0	0	0	1	0	1	0	1	1	0	1	1		0	1	0	0	1	1	1	1	0	1	0	1	1	1	1	1	1	1	1	0	0	1	1	1	1	1	1	1	1	1	1	0	0	1	1	1	1
1	1	1	1	1	1	1	1	1	1	1	1		0	1	1	0	0	1	1	0	0	1	0	1	1	1	1	1	1	1	1	0	0	1	1	1	1	1	1	1	1	1	1	0	0	1	1	1	1
0	1	0	1	1	1	0	0	0	1	1	1		0	1	0	0	1	1	1	0	0	1	0	1	1	1	1	1	1	1	1	0	1	1	1	1	1	1	1	1	1	1	1	0	0	1	1	1	1
1	0	0	1	0	0	0	0	0	0	1	1		0	1	0	0	0	1	0	0	1	0	0	1	1	1	1	1	1	1	0	0	1	1	1	1	1	1	1	1	0	1	1	1	1	1	1	1	1
0	0	0	0	0	0	1	1	1	1	0	1		0	1	1	0	1	1	0	0	1	1	0	1	1	1	1	1	1	1	0	1	0	1	1	1	1	1	1	1	1	1	1	1	0	1	1	1	1
1	1	1	1	1	1	0	1	0	0	1	0		0	1	1	0	1	1	0	0	1	0	0	1	1	1	1	1	1	1	0	0	0	0	1	1	1	1	1	1	0	1	0	0	0	0	1	1	1
0	0	0	0	0	0	0	0	0	0	0	1		0	1	0	0	0	1	1	0	1	0	0	1	1	1	1	1	1	1	0	0	0	1	1	1	1	1	1	1	0	1	0	1	1	0	1	1	1
1	1	1	1	1	1	1	1	1	1	1	1		1	1	0	0	1	1	1	1	0	1	0	1	1	1	1	1	1	1	0	0	0	1	1	1	1	1	1	1	0	1	0	1	1	0	1	1	1
1	1	1	1	1	1	1	1	1	1	1	1		0	1	0	0	1	1	1	1	1	0	1	1	1	1	1	1	1	1	0	1	0	1	1	1	1	1	1	1	1	1	0	1	1	1	1	1	1
1	1	1	1	1	1	1	1	1	1	1	1
1	1	1	1	1	1	1	1	1	1	1	1
1	1	1	1	1	1	1	1	1	1	1	1
1	1	1	1	1	1	1	1	1	1	1	1
1	1	1	1	1	1	1	1	1	1	1	1
0	0	0	1	1	1	0	0	0	0	0	0
0	0	0	0	0	0	0	1	0	0	0	1
0	0	0	0	0	1	1	0	0	0	0	0
1	1	1	1	1	1	1	1	0	1	1	1
1	1	1	1	1	1	1	1	1	1	1	1
1	1	1	1	1	1	1	1	1	1	1	1
1	1	1	1	1	1	1	1	1	1	1	1
1	1	1	1	1	1	1	1	1	1	1	1
1	1	1	1	1	1	1	1	1	1	1	1
1	1	1	1	1	1	1	1	1	1	1	1
1	1	1	1	1	1	0	1	0	0	0	1
1	1	1	1	1	1	1	1	1	1	1	1
1	1	1	1	1	1	1	1	0	0	0	0
0	0	1	0	0	0	1	1	0	1	1	1
0	1	1	0	0	0	1	0	0	1	1	1
1	1	1	1	1	1	1	1	0	0	0	1
1	1	1	1	1	1	1	1	1	1	1	1
1	1	1	1	1	1	1	1	1	1	1	1
1	1	1	1	1	1	1	1	1	1	1	1
1	0	0	1	1	1	1	1	1	0	1	0
1	1	1	1	1	1	1	1	1	1	1	1
1	1	1	1	1	1	1	1	1	1	1	1
1	1	1	1	1	1	1	1	1	1	0	1
1	1	1	1	1	1	1	1	1	1	1	1
1	0	0	1	0	0	1	0	0	0	0	1
1	0	1	1	1	0	0	0	1	1	0	1
1	1	1	1	1	1	1	1	1	1	1	1
1	1	1	1	1	1	1	1	1	1	1	1
0	0	0	1	1	1	0	0	0	1	0	0
0	0	0	0	0	1	0	0	0	1	0	0
1	1	1	0	0	0	0	0	0	0	0	0
1	1	1	1	1	0	1	1	1	1	1	1
0	0	0	0	0	1	0	1	0	0	1	0
0	0	0	0	1	0	0	0	0	0	0	0
1	1	1	1	1	1	1	1	1	1	1	1
1	1	1	0	1	0	1	0	1	1	0	1
0	0	0	0	1	0	0	1	0	0	0	0
0	1	1	1	0	1	1	0	1	1	1	1
1	1	1	1	1	1	0	0	1	1	0	0
1	0	1	1	1	1	1	1	1	1	1	1
0	1	0	1	1	1	0	1	0	0	1	1
0	0	1	1	0	0	0	0	1	1	0	0
0	1	1	0	0	0	0	0	0	0	0	0
1	1	1	1	1	1	1	1	1	1	1	1
0	1	1	0	0	0	0	0	0	0	0	0
1	1	1	1	1	0	1	1	1	1	1	1
1	1	1	1	0	1	1	1	1	1	1	1
0	0	0	0	0	0	1	0	0	1	1	1
0	0	0	0	0	1	0	0	0	0	0	0
1	1	1	1	1	1	1	1	1	1	1	1
0	1	0	0	0	0	0	0	0	0	0	0
1	1	1	1	1	1	0	0	0	1	0	1
1	0	1	1	0	0	1	1	1	1	1	1
1	1	1	1	1	1	1	1	1	1	1	1
1	0	0	0	0	0	1	0	0	1	1	1
1	1	0	1	1	1	0	0	1	1	1	1
1	1	1	1	1	1	1	1	1	1	1	1
1	1	1	1	1	1	1	1	1	1	1	1
0	0	0	0	0	0	0	0	0	0	1	1
1	1	1	1	1	1	0	1	1	1	1	1
1	0	0	0	0	0	0	0	0	0	0	0
1	1	1	1	1	1	1	1	1	1	1	1
1	1	1	1	1	1	1	1	1	1	1	1
1	0	0	0	0	0	0	0	0	0	0	0
1	1	1	1	1	0	1	1	1	1	1	1
1	0	0	0	0	0	0	0	0	1	0	0
1	1	1	1	1	1	1	1	1	1	1	1
1	1	1	1	1	1	1	1	1	1	1	1
1	0	0	0	0	0	0	0	0	0	0	0
1	1	1	1	1	1	1	1	1	1	1	1
1	1	1	1	1	1	1	1	1	1	1	1
1	1	1	1	1	1	1	1	1	1	1	1
1	1	1	1	1	1	1	1	1	1	1	1
1	0	0	1	1	1	0	0	0	0	0	0
1	1	1	1	1	1	0	1	0	0	1	1
1	1	1	1	1	1	0	1	1	0	1	1
1	1	1	1	1	1	0	1	0	0	1	1
1	1	1	1	1	1	1	1	1	1	1	1
1	1	1	1	1	1	1	1	1	0	1	1
1	1	1	1	1	1	1	1	1	1	1	1
1	1	0	1	1	1	1	0	1	1	1	1
1	1	1	1	1	1	0	0	1	1	1	1
1	1	1	1	1	1	1	1	1	1	1	1
1	1	1	1	1	1	1	1	1	1	1	1
0	0	0	0	0	0	1	1	1	1	1	1
0	0	0	1	1	1	0	0	0	0	1	1
0	0	1	1	1	1	1	0	1	0	0	0
1	1	1	0	1	1	1	1	0	1	1	1
1	1	1	1	1	1	1	1	1	1	1	1
1	1	1	1	1	1	1	1	1	1	1	1
0	0	0	0	0	0	0	1	1	1	1	1
1	1	1	1	1	1	1	1	1	1	1	1
1	1	1	1	1	1	1	1	1	1	1	1
0	0	0	0	0	1	1	1	1	1	1	1
1	1	1	1	1	1	1	1	1	1	1	1
1	1	1	1	1	1	1	1	1	1	1	1
1	1	1	0	1	1	1	0	0	0	0	0
1	1	1	1	1	1	1	0	1	0	0	1
1	1	1	1	1	1	1	1	1	1	1	1
1	1	1	1	0	0	0	0	0	0	0	0
1	1	1	1	1	1	1	0	0	0	1	0
1	0	0	1	1	1	1	0	0	0	0	0
1	0	1	1	1	1	0	0	0	0	0	0
1	1	1	1	1	1	1	1	1	1	1	1
1	0	0	0	0	0	0	0	0	0	0	0
1	1	1	1	1	1	1	1	1	1	1	1
0	0	0	1	1	1	1	1	0	1	0	1
1	1	1	1	1	1	1	1	1	1	1	1
0	0	0	0	1	0	0	0	1	1	1	0
1	1	1	1	1	1	1	1	1	1	1	1
0	0	0	0	1	0	0	0	0	1	1	0
1	0	0	0	0	0	0	0	0	0	1	1
1	1	0	0	0	0	0	0	0	0	1	1
1	0	1	0	0	0	0	0	0	0	0	0
0	0	0	0	0	0	1	1	0	1	1	1
1	1	1	1	1	1	1	1	1	1	1	1
0	0	1	0	0	0	1	1	1	1	1	1
1	1	1	1	1	1	0	0	0	0	1	1
1	1	1	1	1	1	1	1	1	1	1	1
1	1	1	1	1	1	1	1	1	1	1	1
1	1	1	1	0	1	1	1	0	1	0	0
1	1	1	1	1	1	1	1	1	1	1	1
1	1	1	1	1	1	1	1	1	1	1	1
1	1	1	1	1	1	1	1	1	1	1	1
1	1	1	1	1	1	1	1	1	1	1	1
0	1	1	0	1	1	1	1	0	1	0	0
1	1	1	1	1	1	1	1	1	1	1	1
1	1	1	1	1	1	1	1	1	1	1	1
1	1	1	1	1	1	1	1	1	1	1	1
1	1	1	1	1	1	1	1	1	1	1	1
1	1	1	1	1	1	1	1	1	1	1	1
1	1	1	1	1	1	1	1	1	1	1	1
0	0	0	0	0	0	0	0	0	0	0	1
1	1	1	1	1	1	1	1	1	1	1	1
1	1	1	1	1	1	1	1	1	1	1	1
0	0	0	0	0	0	0	0	0	0	1	0
1	1	1	1	1	1	1	1	1	1	1	1
0	0	1	0	1	0	0	1	1	0	0	0
1	1	0	0	0	0	0	0	0	0	0	0
0	0	0	1	0	1	0	1	1	0	1	1
1	1	1	1	1	1	1	1	1	1	1	1
0	1	0	1	1	1	0	0	0	1	1	1
1	0	0	1	0	0	0	0	0	0	1	1
0	0	0	0	0	0	1	1	1	1	0	1
1	1	1	1	1	1	0	1	0	0	1	0
0	0	0	0	0	0	0	0	0	0	0	1
1	1	1	1	1	1	1	1	1	1	1	1
1	1	1	1	1	1	1	1	1	1	1	1
1	1	1	1	1	1	1	1	1	1	1	1
1	1	1	1	1	1	1	1	1	1	1	1
1	1	1	1	1	1	1	1	1	1	1	1
1	1	1	1	1	1	1	1	1	1	1	1
1	1	1	1	1	1	1	1	1	1	1	1
0	0	0	1	1	1	0	0	0	0	0	0
0	0	0	0	0	0	0	1	0	0	0	1
0	0	0	0	0	1	1	0	0	0	0	0
1	1	1	1	1	1	1	1	0	1	1	1
1	1	1	1	1	1	1	1	1	1	1	1
1	1	1	1	1	1	1	1	1	1	1	1
1	1	1	1	1	1	1	1	1	1	1	1
1	1	1	1	1	1	1	1	1	1	1	1
1	1	1	1	1	1	1	1	1	1	1	1
1	1	1	1	1	1	1	1	1	1	1	1
1	1	1	1	1	1	0	1	0	0	0	1
1	1	1	1	1	1	1	1	1	1	1	1
1	1	1	1	1	1	1	1	0	0	0	0
0	0	1	0	0	0	1	1	0	1	1	1
0	1	1	0	0	0	1	0	0	1	1	1
1	1	1	1	1	1	1	1	0	0	0	1
1	1	1	1	1	1	1	1	1	1	1	1
1	1	1	1	1	1	1	1	1	1	1	1
1	1	1	1	1	1	1	1	1	1	1	1
1	0	0	1	1	1	1	1	1	0	1	0
1	1	1	1	1	1	1	1	1	1	1	1
1	1	1	1	1	1	1	1	1	1	1	1
1	1	1	1	1	1	1	1	1	1	0	1
1	1	1	1	1	1	1	1	1	1	1	1
1	0	0	1	0	0	1	0	0	0	0	1
1	0	1	1	1	0	0	0	1	1	0	1
1	1	1	1	1	1	1	1	1	1	1	1
1	1	1	1	1	1	1	1	1	1	1	1
0	0	0	1	1	1	0	0	0	1	0	0
0	0	0	0	0	1	0	0	0	1	0	0
1	1	1	0	0	0	0	0	0	0	0	0
1	1	1	1	1	0	1	1	1	1	1	1
0	0	0	0	0	1	0	1	0	0	1	0
0	0	0	0	1	0	0	0	0	0	0	0
1	1	1	1	1	1	1	1	1	1	1	1
1	1	1	0	1	0	1	0	1	1	0	1
0	0	0	0	1	0	0	1	0	0	0	0
0	1	1	1	0	1	1	0	1	1	1	1
1	1	1	1	1	1	0	0	1	1	0	0
1	0	1	1	1	1	1	1	1	1	1	1
0	1	0	1	1	1	0	1	0	0	1	1
0	0	1	1	0	0	0	0	1	1	0	0
0	1	1	0	0	0	0	0	0	0	0	0
1	1	1	1	1	1	1	1	1	1	1	1
0	1	1	0	0	0	0	0	0	0	0	0
1	1	1	1	1	0	1	1	1	1	1	1
1	1	1	1	0	1	1	1	1	1	1	1
0	0	0	0	0	0	1	0	0	1	1	1
0	0	0	0	0	1	0	0	0	0	0	0
1	1	1	1	1	1	1	1	1	1	1	1
0	1	0	0	0	0	0	0	0	0	0	0
1	1	1	1	1	1	0	0	0	1	0	1
1	0	1	1	0	0	1	1	1	1	1	1
1	1	1	1	1	1	1	1	1	1	1	1
1	0	0	0	0	0	1	0	0	1	1	1
1	1	0	1	1	1	0	0	1	1	1	1
1	1	1	1	1	1	1	1	1	1	1	1
1	1	1	1	1	1	1	1	1	1	1	1
0	0	0	0	0	0	0	0	0	0	1	1
1	1	1	1	1	1	0	1	1	1	1	1
1	0	0	0	0	0	0	0	0	0	0	0
1	1	1	1	1	1	1	1	1	1	1	1
1	1	1	1	1	1	1	1	1	1	1	1
1	0	0	0	0	0	0	0	0	0	0	0
1	1	1	1	1	0	1	1	1	1	1	1
1	0	0	0	0	0	0	0	0	1	0	0
1	1	1	1	1	1	1	1	1	1	1	1
1	1	1	1	1	1	1	1	1	1	1	1
1	0	0	0	0	0	0	0	0	0	0	0
1	1	1	1	1	1	1	1	1	1	1	1
1	1	1	1	1	1	1	1	1	1	1	1
1	1	1	1	1	1	1	1	1	1	1	1
1	1	1	1	1	1	1	1	1	1	1	1
1	0	0	1	1	1	0	0	0	0	0	0
1	1	1	1	1	1	0	1	0	0	1	1
1	1	1	1	1	1	0	1	1	0	1	1
1	1	1	1	1	1	0	1	0	0	1	1
1	1	1	1	1	1	1	1	1	1	1	1
1	1	1	1	1	1	1	1	1	0	1	1
1	1	1	1	1	1	1	1	1	1	1	1
1	1	0	1	1	1	1	0	1	1	1	1
1	1	1	1	1	1	0	0	1	1	1	1
1	1	1	1	1	1	1	1	1	1	1	1
1	1	1	1	1	1	1	1	1	1	1	1
0	0	0	0	0	0	1	1	1	1	1	1
0	0	0	1	1	1	0	0	0	0	1	1
0	0	1	1	1	1	1	0	1	0	0	0
1	1	1	0	1	1	1	1	0	1	1	1
1	1	1	1	1	1	1	1	1	1	1	1
1	1	1	1	1	1	1	1	1	1	1	1
0	0	0	0	0	0	0	1	1	1	1	1
1	1	1	1	1	1	1	1	1	1	1	1
1	1	1	1	1	1	1	1	1	1	1	1
0	0	0	0	0	1	1	1	1	1	1	1
1	1	1	1	1	1	1	1	1	1	1	1
1	1	1	1	1	1	1	1	1	1	1	1
1	1	1	0	1	1	1	0	0	0	0	0
1	1	1	1	1	1	1	0	1	0	0	1
1	1	1	1	1	1	1	1	1	1	1	1
1	1	1	1	0	0	0	0	0	0	0	0
1	1	1	1	1	1	1	0	0	0	1	0
1	0	0	1	1	1	1	0	0	0	0	0
1	0	1	1	1	1	0	0	0	0	0	0
1	1	1	1	1	1	1	1	1	1	1	1
1	0	0	0	0	0	0	0	0	0	0	0
1	1	1	1	1	1	1	1	1	1	1	1
0	0	0	1	1	1	1	1	0	1	0	1
1	1	1	1	1	1	1	1	1	1	1	1
0	0	0	0	1	0	0	0	1	1	1	0
1	1	1	1	1	1	1	1	1	1	1	1
0	0	0	0	1	0	0	0	0	1	1	0
1	0	0	0	0	0	0	0	0	0	1	1
1	1	0	0	0	0	0	0	0	0	1	1
1	0	1	0	0	0	0	0	0	0	0	0
0	0	0	0	0	0	1	1	0	1	1	1
1	1	1	1	1	1	1	1	1	1	1	1
0	0	1	0	0	0	1	1	1	1	1	1
1	1	1	1	1	1	0	0	0	0	1	1
1	1	1	1	1	1	1	1	1	1	1	1
1	1	1	1	1	1	1	1	1	1	1	1
1	1	1	1	0	1	1	1	0	1	0	0
1	1	1	1	1	1	1	1	1	1	1	1
1	1	1	1	1	1	1	1	1	1	1	1
1	1	1	1	1	1	1	1	1	1	1	1
1	1	1	1	1	1	1	1	1	1	1	1
0	1	1	0	1	1	1	1	0	1	0	0
1	1	1	1	1	1	1	1	1	1	1	1
1	1	1	1	1	1	1	1	1	1	1	1
1	1	1	1	1	1	1	1	1	1	1	1
1	1	1	1	1	1	1	1	1	1	1	1
1	1	1	1	1	1	1	1	1	1	1	1
1	1	1	1	1	1	1	1	1	1	1	1
0	0	0	0	0	0	0	0	0	0	0	1
1	1	1	1	1	1	1	1	1	1	1	1
1	1	1	1	1	1	1	1	1	1	1	1
[truncated: 269 more columns]

## Sheet: ISSR-SCoT similarity matrixes
Individual ISSR-SCoT similarity matrixes
					ISSR
	1	2	3	4	5	6	7	8	9	10	11	12
1	100
2	89	100
3	92	92	100
4	88	84	87	100
5	86	87	88	90	100
6	85	84	86	92	93	100
7	85	81	85	85	83	85	100
8	84	82	83	82	81	83	93	100
9	87	84	86	83	84	85	92	93	100
10	87	81	84	84	83	85	89	88	91	100
11	86	81	84	85	84	87	90	87	91	96	100
12	84	81	85	89	84	88	88	86	88	92	94	100
					SCoT
	1	2	3	4	5	6	7	8	9	10	11	12
1	100
2	89	100
3	88	92	100
4	89	88	88	100
5	87	88	87	92	100
6	85	87	85	92	91	100
7	82	83	85	83	82	83	100
8	80	83	85	84	84	84	87	100
9	81	81	85	85	83	81	86	86	100
10	80	82	83	82	82	80	88	84	89	100
11	81	83	81	84	82	82	84	86	85	86	100
12	84	84	83	86	82	82	86	87	85	87	91	100
					ISSR and SCoT
	1	2	3	4	5	6	7	8	9	10	11	12
1	100
2	89	100
3	88	92	100
4	89	88	88	100
5	87	88	87	92	100
6	85	87	85	92	91	100
7	82	83	85	83	82	83	100
8	80	83	85	84	84	84	87	100
9	81	81	85	85	83	81	86	86	100
10	80	82	83	82	82	80	88	84	89	100
11	81	83	81	84	82	82	84	86	85	86	100
12	84	84	83	86	82	82	86	87	85	87	91	100

## Sheet: Barcoding sequence estimates
Evaluation of two DNA barcode regions.
	DNA barcode regions			Used software
	matk	rbcL	matk+ rbcL
Number of individuals	12	12	-
PCR success (%)	100	100	-
Sequence length	501	548	1031
Aligned length	501	548	1031
Number of variable sites	28/501	49/548	68/1031	Analyzed by Mega X
Number of indels	0	0	0
Number of informative sites (Parsim-info)	16/501	1/548	17/1031
Conserved regions	473/501	487/548	954/1031
singleton	12/501	46/548	51/1031
Zero-fold	318/501	356/548	637/1031
Two-fold	116/501	88/548	221/1031
Four-fold	51/501	76/548	127/1031
Coverage (100%)	485/501	520/548	629/1031
CpG (Percent Conservation)	99/501	53/548	151/1031
Mean of distance	1.65513	0.419	1.37448	Analyzed by R
median	1.66367	0	1.44712
max	3.36348	2.1624	2.59434
min	0	0	0
Base composition: A	0.307	0.267	0.287
Base composition: C	0.175	0.208	0.192
Base composition: G	0.135	0.235	0.183
Base composition: T	0.383	0.29	0.338
Total	6.01 kb	6.58 kb	12.37 kb
GC content	0.31	0.443	37.5
