# Supplementary material for: Genetic diversity analysis in wheat cultivars using SCoT and ISSR markers, chloroplast DNA barcoding and grain SEM
Source: BMC Plant Biol. 2023 Apr 11;23:193. doi: 10.1186/s12870-023-04196-w (PMC10088244; doi:10.1186/s12870-023-04196-w)
Supplement: Supplementary file 3 — Additional file 3. [file 12870_2023_4196_MOESM3_ESM.xlsx]

## Sheet: Cultivars names and codes
The source, country, cultivar names, and recorded grain exomorphic characters of the 12 studied wheat cultivars
No.	Source	country	code: cultiver name	Surface pattern-Ventral	Surface pattern-Dorsal	Anticlinal wall-Thickness-ventral	Anticlinal wall-Thickness-dorsal	Anticlinal wall-Surface-ventral	Anticlinal wall-Surface-dorsal	Periclinal wall-Surface- ventral	Periclinal wall-Surface- dorsal	Periclinal wall-Elevation-ventral	Periclinal wall-Elevation-dorsal
1	Egypt	Egypt	Sacha	Scalariform foviate	Scalariform reticulate	Broad	Broad	Smooth	Smooth	Foveate stria	Fine stria	Elevated	Shallow elevated
2	Egypt	Egypt	Gemmeiza-9	Scalariform	Scalariform reticulate	Thick	Broad	Smooth	Smooth	Fine stria foveate	Fine stria foveate	Depressed	Shallow elevated
3	Egypt	Egypt	Giza-168	Scalariform reticulate foveate	Reticulate	Thick	Thick	Striated	Striated	Foveate stria	Fine stria	Elevated	Shallow elevated
4	North America	Mexico	Attila	Salariform reticulate	Salariform reticulate	Broad *Epicuticular wax	Broad	Smooth	Smooth	Fine stria	Constricted	Depressed	Shallow depressed
5	Africa	Morocco	Aguilal	Scalariform reticulate	Reticulate	Thick	Thick	Smooth	Smooth	Fine transverse stria	Fine transverse stria	Shallow depressed	Elevated
6	Africa	Sudan	El-Nielain	Scalariform reticulate foveate	Scalariform reticulate foveate	Thick	Thick	Striated	Striated	Foveate stria	Foveate stria	Shallow depressed	Shallow depressed
7	Asia	Syria	Cham-10	Scalariform foviate	Salariform	Thin	Thin	Smooth	Smooth	Stria foveate	Longitudinal Stria	Shallow elevated	Shallow elevated
8	Asia	Pakistan	Inqalab	Scalariform reticulate	Scalariform reticulate	Thick	Thick	Smooth	Smooth	Longitudinal Stria	TransverseStria	Shallow depressed	Shallow depressed
9	Asia	India	Sonalika	Scalariform reticulate foveate	Scalariform reticulate foveate	Thin	Thin	Striated	Striated	Stria foveate	Stria foveate	Shallow depressed	Shallow elevated
10	North America	Mexico	Seri-82	Scalariform reticulate foveate	Scalariform reticulate foveate	Thick	Thick	Striated	Striated	Fine striated foveate	Foveate striated	Shallow depressed	Shallow elevated
11	Australia	Australia	Cook	Scalariform reticulate	Scalariform reticulate	Broad *Epicuticular wax	Broad *Epicuticular wax	Smooth	Smooth	Striated longitudinal	Transverse stria	shallow depressed	Shallow depressed
12	China	China	Chinese-166	Scalariform reticulate	Scalariform reticulate	Broad *Epicuticular wax	Broad *Epicuticular wax	Smooth	Smooth	Fine stria	constricted	Depressed	Shallow depressed

## Sheet: Grain Surface Sculptures
Detailed characters and traits of the grain SEM recorded in the 12 studied wheat cultivars showing their multistate and binary matrices.
Character						Sacha	Gemmeiza-9	Giza-168	Attila	Aguilal	El-Nielain	Cham-10	Inqalab	Sonalika	Seri-82	Cook	Chinese-166
1. Surface pattern	1	Surface pattern-Ventral	Scalariform	SPVS	1	0	1	0	0	0	0	0	0	0	0	0	0
1.1. Ventral	2		Scalariform, foviate	SPVSF	2	1	0	0	0	0	0	1	0	0	0	0	0
	3		Salariform , reticulate	SPVSR	3	0	0	0	1	1	0	0	1	0	0	1	1
	4		Scalariform, reticulate, foveate.	SPVSRF	4	0	0	1	0	0	1	0	0	1	1	0	0
1.2. Dorsal	5	Surface pattern-Dorsal	Scalariform	SPDS	1	0	0	0	0	0	0	1	0	0	0	0	0
	6		Salariform , reticulate	SPDSR	2	1	1	0	1	0	0	0	1	0	0	0	0
	7		Scalariform, reticulate, foveate.	SPDSRF	3	0	0	0	0	0	1	0	0	1	0	1	1
	8		reticulate	SPDR	4	0	0	1	0	1	0	0	0	0	1	0	0
1. Anticlinal wall	10	Anticlinal wall-Thickness-ventral	Broad	AWTVB	1	1	0	0	0	0	0	0	0	0	0	0	0
1.1. Thickness	11		Broad *Epicuticular wax	AWTVBW	2	0	0	0	1	0	0	0	0	0	0	1	1
2.1.1 Ventral	12		Thick	AWTVK	3	0	1	1	0	1	1	0	1	0	1	0	0
	13		Thin	AWTVN	4	0	0	0	0	0	0	1	0	1	0	0	0
2.1.2 Dorsal	14	Anticlinal wall-Thickness-dorsal	Broad	AWTDB	1	1	1	0	1	0	0	0	0	0	0	0	0
	15		Thick	AWTDK	2	0	0	1	0	1	1	0	1	0	0	1	1
	16		Thin	AWTDN	3	0	0	0	0	0	0	1	0	1	1	0	0
1.1. Surface	18	Anticlinal wall-Surface-ventral	Smooth	AWSVM	1	1	1	0	1	1	0	1	1	0	0	1	1
2.1.1 Ventral	19		Striated	AWSVT	2	0	0	1	0	0	1	0	0	1	1	0	0
2.1.2 Dorsal	20	Anticlinal wall-Surface-dorsal	Smooth	AWSDM	1	1	1	0	1	1	0	1	1	0	0	1	1
	21		Striated	AWSDT	2	0	0	1	0	0	1	0	0	1	1	0	0
1. Periclinal wall	22	Periclinal wall-Surface- ventral	Foveate stria	PWSVFOS	1	1	0	1	0	0	1	1	0	1	0	0	0
1.1. Surface	23		Fine stria	PWSVFIS	2	0	0	0	1	0	0	0	0	0	0	0	1
3.1.1 Ventral	24		Fine transverse stria	PWSVFITS	3	0	1	0	0	1	0	0	0	0	0	0	0
	25		Longitudinal Stria	PWSVLS	4	0	0	0	0	0	0	0	1	0	0	1	0
	26		Fine striated foveate	PWSFSF	5	0	0	0	0	0	0	0	0	0	1	0	0
3.1.1 Dorsal	27	Periclinal wall-Surface- dorsal	F+D26:P32oveate stria	PWSDFOS	1	0	0	0	0	0	1	0	0	1	1	0	0
	28		Fine stria	PWSDFIS	2	1	0	1	0	0	0	0	0	0	0	0	0
	29		Fine stria foveate	PWSDFISFO	3	0	1	0	0	0	0	0	0	0	0	0	0
	30		Constricted	PWSDC	4	0	0	0	1	0	0	0	0	0	0	0	1
	31		Fine transverse stria	PWSDFITS	5	0	0	0	0	1	0	0	0	0	0	0	0
	32		Longitudinal Stria	PWSDLS	6	0	0	0	0	0	0	1	0	0	0	0	0
	33		Transverse Stria	PWSDTS	7	0	0	0	0	0	0	0	1	0	0	1	0
1.1. Elevation	34	Periclinal wall-Elevation-ventral	Elevated	PWEVE	1	1	0	1	0	0	0	0	0	0	0	0	0
1.1.1. Ventral	35		Shallow elevated	PWEVSE	2	0	0	0	0	0	1	1	0	0	1	0	0
	36		Depressed	PWEVD	3	0	1	0	1	0	0	0	0	0	0	0	1
	37		Shallow depressed	PWEVSD	4	0	0	0	0	1	1	0	1	1	0	1	0
1.1.1. Dorsal	38	Periclinal wall-Elevation-dorsal	Elevated	PWEDE	1	0	0	0	0	1	0	0	0	0	0	0	0
	39		Shallow elevated	PWEDSE	2	1	1	1	0	0	0	1	0	1	1	0	0
	40		Shallow depressed	PWEDSD	3	0	0	0	1	0	1	0	1	0	0	1	1

## Sheet: Binary Matrix
The Binary Matrix of recorded grain exomorphic characters
	SPVS	SPVSF	SPVSR	SPVSRF	SPDS	SPDSR	SPDSRF	SPDR	AWTVB	AWTVBW	AWTVK	AWTVN	AWTDB	AWTDK	AWTDN	AWSVM	AWSVT	AWSDM	AWSDT	PWSVFOS	PWSVFIS	PWSVFITS	PWSVLS	PWSFSF	PWSDFOS	PWSDFIS	PWSDFISFO	PWSDC	PWSDFITS	PWSDLS	PWSDTS	PWEVE	PWEVSE	PWEVD	PWEVSD	PWEDE	PWEDSE	PWEDSD
Sacha	0	1	0	0	0	1	0	0	1	0	0	0	1	0	0	1	0	1	0	1	0	0	0	0	0	1	0	0	0	0	0	1	0	0	0	0	1	0
Gemmeiza-9	1	0	0	0	0	1	0	0	0	0	1	0	1	0	0	1	0	1	0	0	0	1	0	0	0	0	1	0	0	0	0	0	0	1	0	0	1	0
Giza-168	0	0	0	1	0	0	0	1	0	0	1	0	0	1	0	0	1	0	1	1	0	0	0	0	0	1	0	0	0	0	0	1	0	0	0	0	1	0
Attila	0	0	1	0	0	1	0	0	0	1	0	0	1	0	0	1	0	1	0	0	1	0	0	0	0	0	0	1	0	0	0	0	0	1	0	0	0	1
Aguilal	0	0	1	0	0	0	0	1	0	0	1	0	0	1	0	1	0	1	0	0	0	1	0	0	0	0	0	0	1	0	0	0	0	0	1	1	0	0
El-Nielain	0	0	0	1	0	0	1	0	0	0	1	0	0	1	0	0	1	0	1	1	0	0	0	0	1	0	0	0	0	0	0	0	1	0	1	0	0	1
Cham-10	0	1	0	0	1	0	0	0	0	0	0	1	0	0	1	1	0	1	0	1	0	0	0	0	0	0	0	0	0	1	0	0	1	0	0	0	1	0
Inqalab	0	0	1	0	0	1	0	0	0	0	1	0	0	1	0	1	0	1	0	0	0	0	1	0	0	0	0	0	0	0	1	0	0	0	1	0	0	1
Sonalika	0	0	0	1	0	0	1	0	0	0	0	1	0	0	1	0	1	0	1	1	0	0	0	0	1	0	0	0	0	0	0	0	0	0	1	0	1	0
Seri-82	0	0	0	1	0	0	0	1	0	0	1	0	0	0	1	0	1	0	1	0	0	0	0	1	1	0	0	0	0	0	0	0	1	0	0	0	1	0
Cook	0	0	1	0	0	0	1	0	0	1	0	0	0	1	0	1	0	1	0	0	1	0	0	0	0	0	0	1	0	0	0	0	0	1	0	0	0	1
Chinese-166	0	0	1	0	0	0	1	0	0	1	0	0	0	1	0	1	0	1	0	0	1	0	0	0	0	0	0	1	0	0	0	0	0	1	0	0	0	1
